# Supplementary material for: Morphology evolution of Ag/Au nanocomposites via temperature-controlled galvanic exchange to enhance catalytic activity
Source: Royal Society of Chemistry journal article supplement (doi:10.1039/c6ra26249j), 2017-01-01
Supplement: c6ra26249j1.pdf [file c6ra26249j1.pdf]

†Electronic Supporting Information

Morphology evolution of Ag/Au nanocomposites  
via temperature-controlled galvanic exchange to  
enhance catalytic activity

*Tae-Hyeon Park, Hyeri Lee, Jaewon Lee and Du-Jeon Jang\**

Department of Chemistry, Seoul National University, NS60, Seoul 08826, Korea

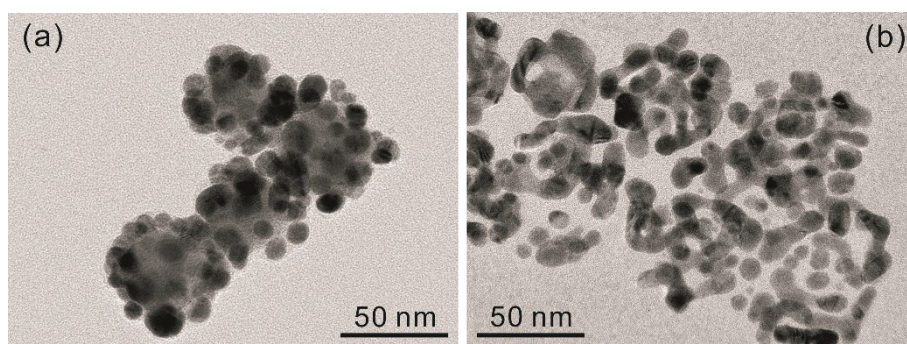

**Fig. S1.** TEM images of (a) Ag/Au(0) and (b) Ag/Au(105).

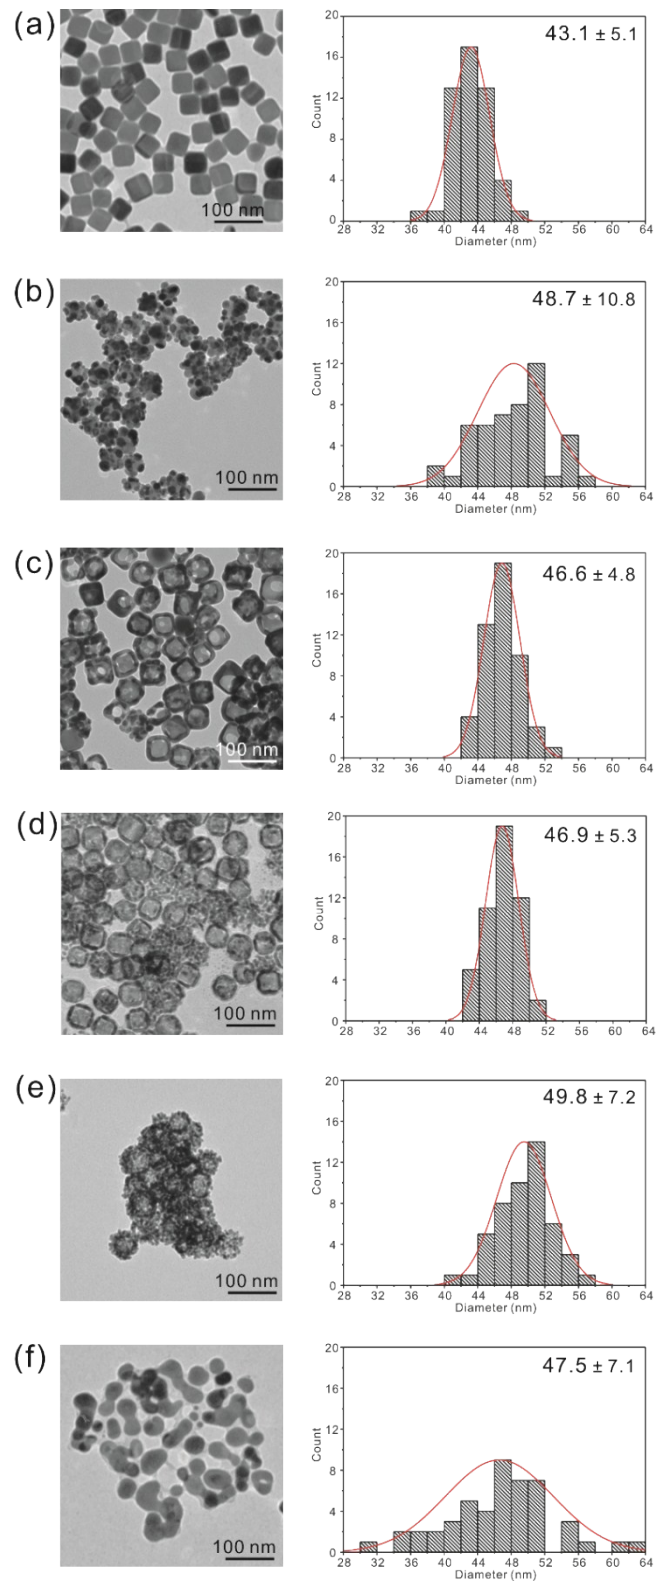

**Fig. S2.** TEM images and edge-size distribution histograms of (a) Ag(pr), (b) Ag/Au(0), (c) Ag/Au(25), (d) Ag/Au(55), (e) Ag/Au(85), and (f) Ag/Au(105). Average edge sizes are indicated inside the histograms.

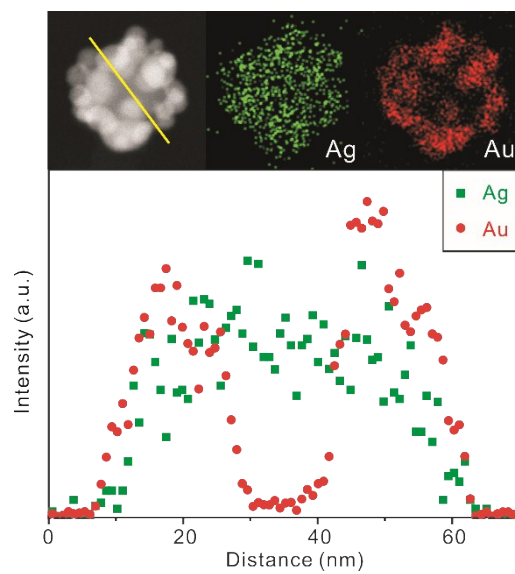

**Fig. S3.** STEM image, EDX elemental maps, and area-normalized line-scanned (along the line of the STEM image) elemental intensity profiles of Ag/Au(0).

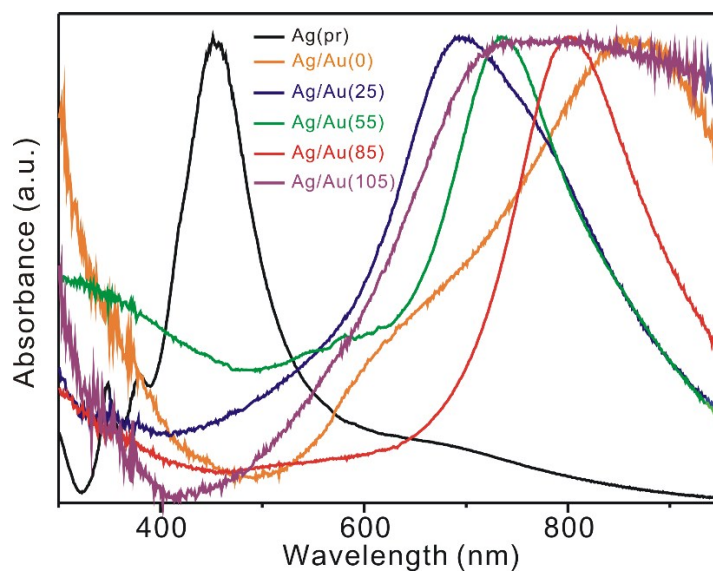

**Fig. S4.** Maximum-normalized surface-plasmon resonance spectra of indicated nanocatalysts in water.

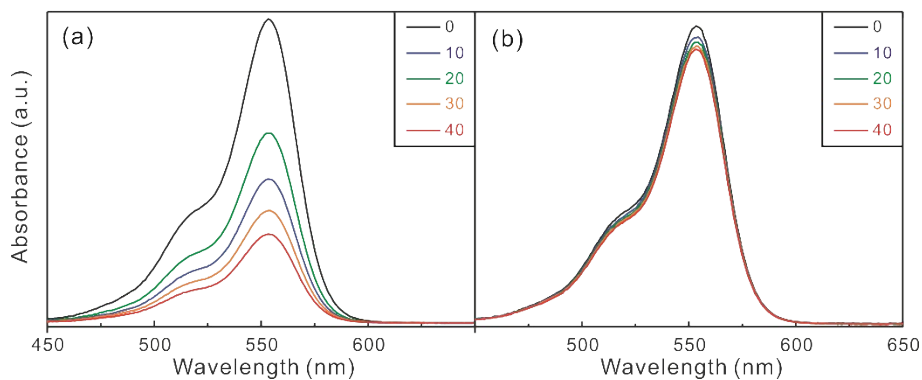

**Fig. S5.** Absorption spectra at 25 °C of 11  $\mu\text{M}$  RhB(aq) in the presence of 1.3 mM  $\text{KBH}_4$ , measured at elapsed times indicated in the units of min after addition of (a) Ag/Au(0) and (b) Ag/Au(105).

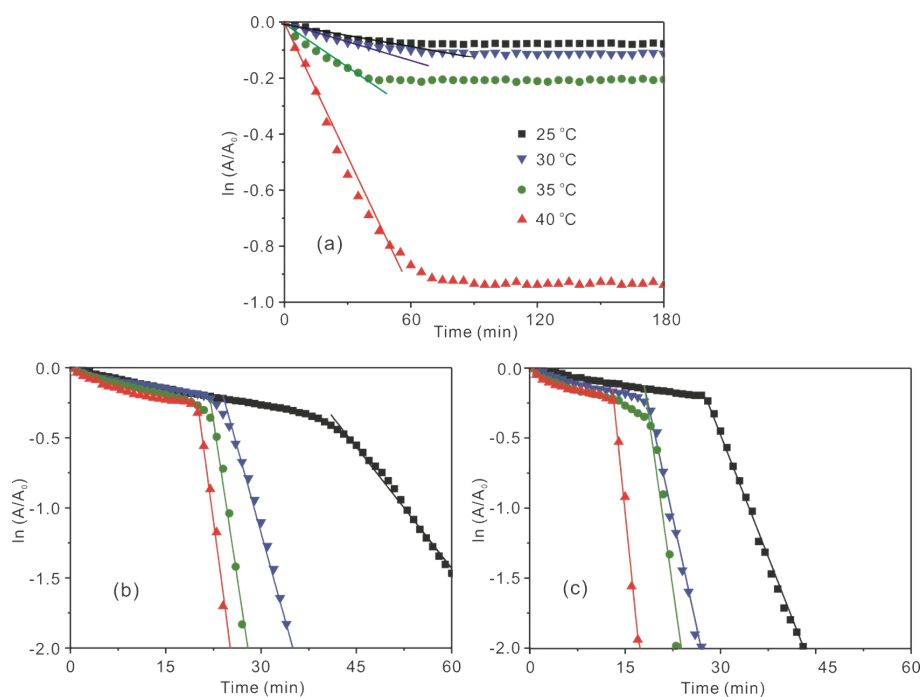

**Fig. S6.**  $\ln(A/A_0)$  vs  $t$  for the catalytic reduction of 11  $\mu\text{M}$  RhB(aq) via (a) Ag(pr), (b) Ag/Au(25), and (c) Ag/Au(55) in the presence of 1.3 mM  $\text{KBH}_4$  at indicated temperatures.

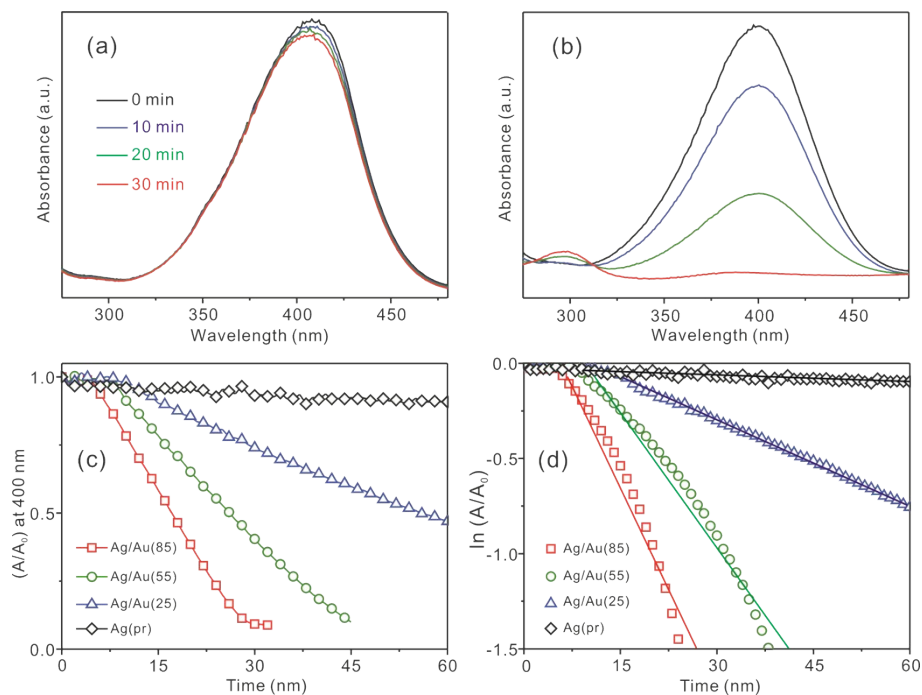

**Fig. S7.** Absorption spectra at 25 °C of 33  $\mu\text{M}$  4-NP(aq) in the presence of 2.0 mM  $\text{KBH}_4$ , measured at elapsed times indicated in the units of min after addition of (a) Ag(pr) and (b) Ag/Au(85). Decay kinetic profiles at 400 nm (c) and first-order decay profiles (d) of 4-NP via indicated nancatalysts in the presence of  $\text{KBH}_4$ .

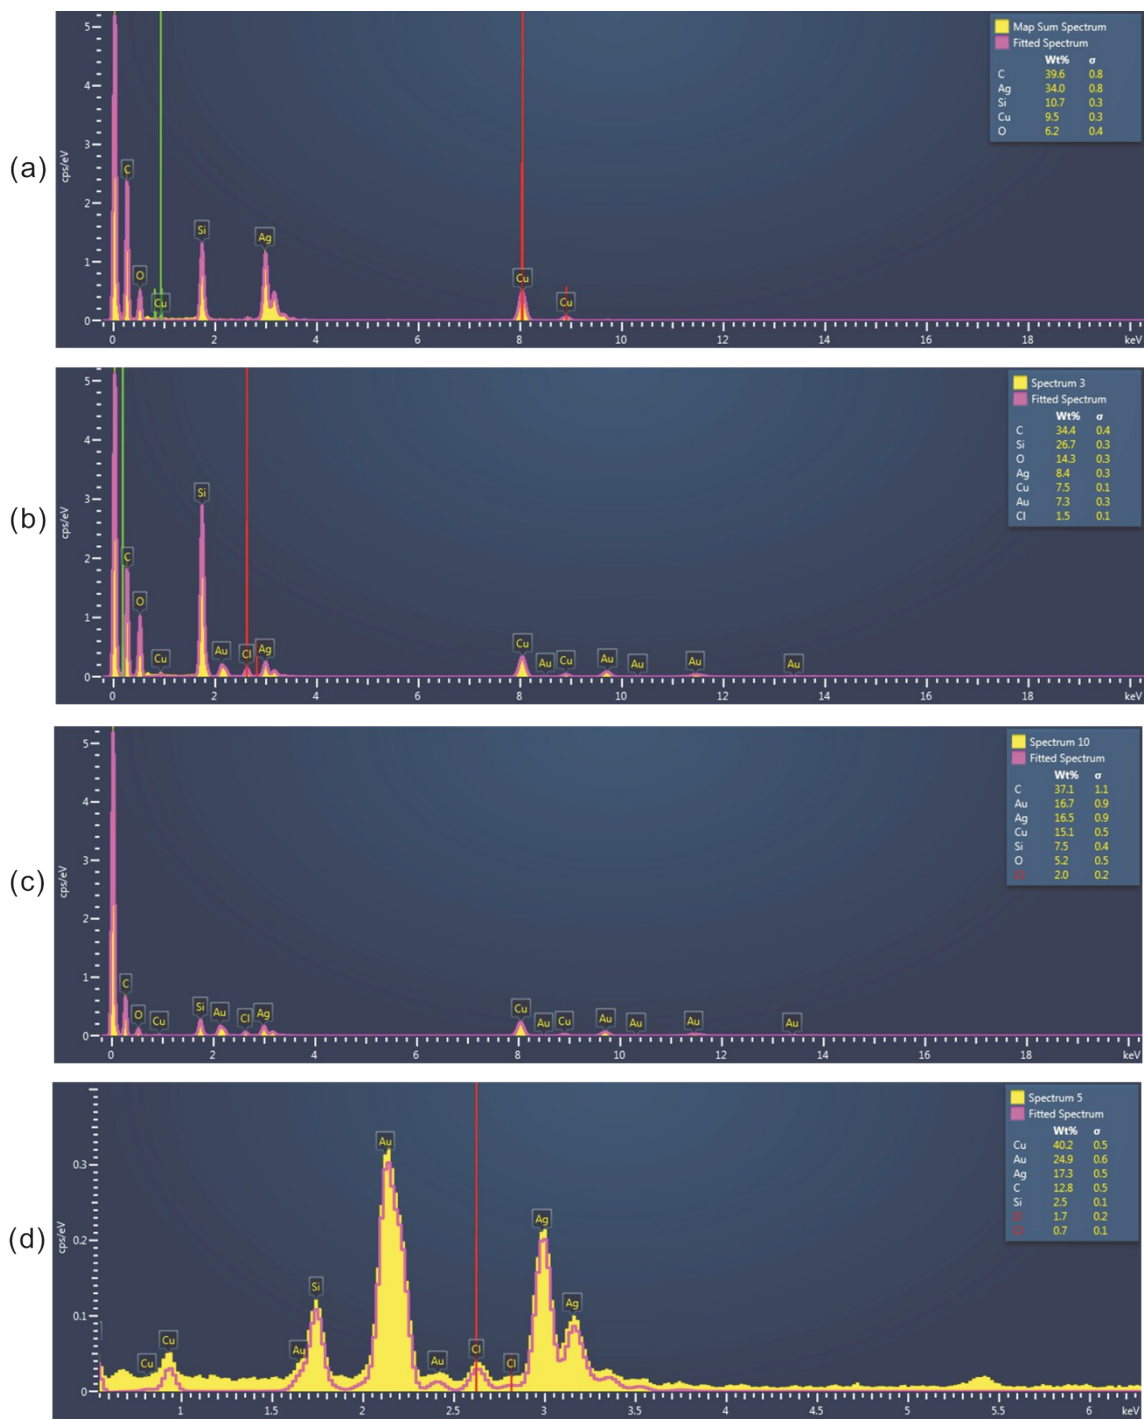

**Fig. S8.** EDX analysis spectra of (a) Ag(pr), (b) Ag/Au(25), (c) Ag/Au(55), and (d) Ag/Au(85).

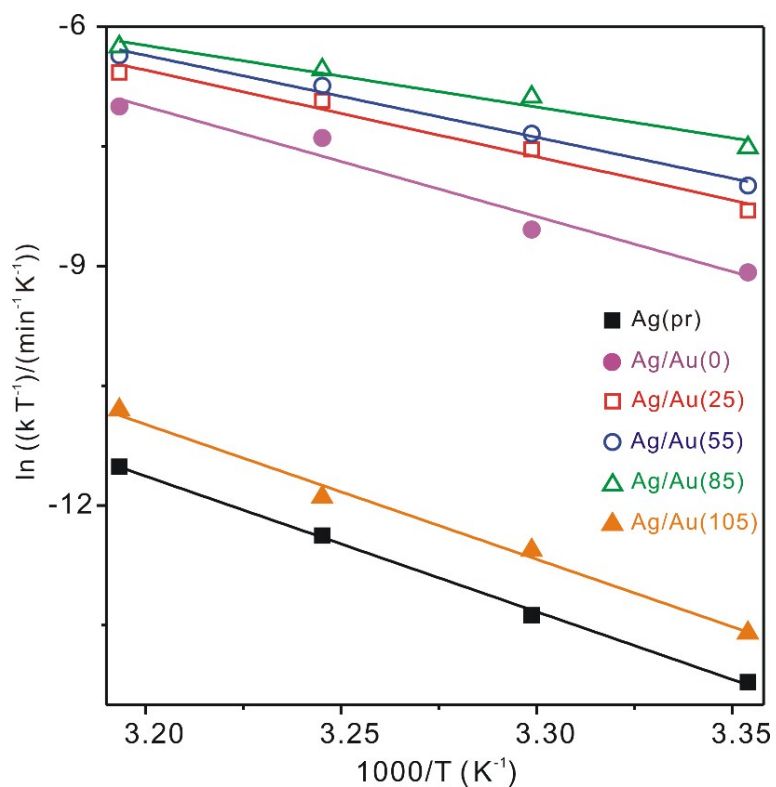

**Fig. S9.** Eyring plots for the catalytic reduction reaction of 11  $\mu\text{M}$  RhB(aq) via indicated nanocatalysts in the presence of 1.3 mM  $\text{KBH}_4$ .

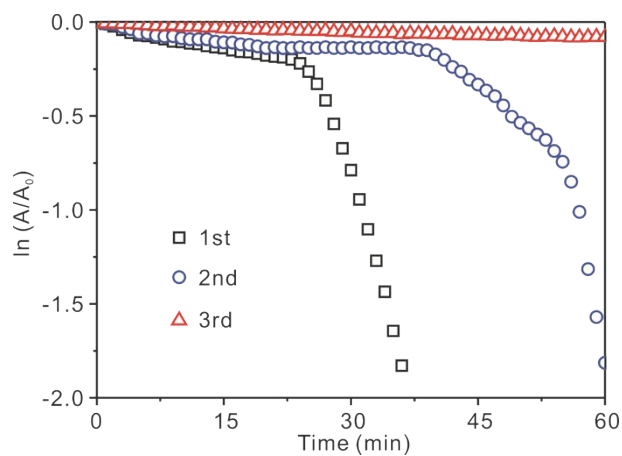

**Fig. S10.**  $\ln(A/A_0)$  vs  $t$  for the catalytic reduction of 11  $\mu\text{M}$  RhB(aq) via Ag/Au(85) in the presence of 1.3 mM  $\text{KBH}_4$  at 25  $^\circ\text{C}$  for three indicated recycles.
